# Supplementary material
Source: PubMed Central journal article supplement (PMC4720534)
Supplement: NIHMS726855-supplement-Acceptance_letter.pdf [file NIHMS726855-supplement-Acceptance_letter.pdf]

## View Letter

Close

**Date:** 09/28/2015  
**To:** "Raj K. Kalapatapu" kalapatapu.raj.k@gmail.com  
**From:** "Adam John Mackridge" JADEditor@icloud.com  
**Subject:** Your Submission

---

Ref.: Ms. No. JAD-S-15-00003R1  
Substance Use History in Behavioral-Variant Frontotemporal Dementia versus Primary Progressive Aphasia  
Journal of Addictive Diseases

Dear Dr. Kalapatapu:

Congratulations! I am pleased to inform you that your work has now been accepted for publication by the Journal of Addictive Diseases.

If you have not already done so, please submit the necessary copyright transfer forms for each author. We cannot begin production on your manuscript until these forms have been received.

Thank you for submitting your important work to the Journal and your patience with the review process. We look forward to working with you toward its publication.

Best regards,

Editor  
Journal of Addictive Diseases

---

Close
